# Supplementary material
Source: PubMed Central journal article supplement (PMC5819594)
Supplement: NIHMS940931-supplement-supp_2.pdf [file NIHMS940931-supplement-supp_2.pdf]

**Table S1**

| <b>Parameters</b>                                                 | <b>Physio-chemical properties of nanoworms (NWs)</b>                 |                 |
|-------------------------------------------------------------------|----------------------------------------------------------------------|-----------------|
| <b>Composition</b>                                                | Dextran-coated aminated iron oxide-NW                                |                 |
| <b>Electric Charge (Zeta Potential)</b><br>(Measured in DI water) | Aminated-NW                                                          | 11.10 ± 0.36 mV |
|                                                                   | 5K-PEG-NW                                                            | -1.35 ± 1.0 mV  |
|                                                                   | LinTT1-D[KLAKLAK] <sub>2</sub> -NW<br>(includes 5K-PEG linker)       | -1.26 ± 0.86 mV |
| <b>Size</b><br>(Measured by Dynamic Light Scattering)             | Aminated-NW                                                          | 45.6 ± 4.0 nm   |
|                                                                   | 5K-PEG-NW                                                            | 49.0 ± 1.0 nm   |
|                                                                   | LinTT1-D[KLAKLAK] <sub>2</sub> -NW<br>(includes 5K-PEG linker)       | 49.0 ± 1.0 nm   |
| <b>Shape (TEM)</b>                                                | Elongated worm like particles                                        |                 |
| <b>Peptide linkers</b>                                            | 5K-polyethylene glycol (PEG)                                         |                 |
| <b>Surface density</b>                                            | The final coupling ratio was 22 nmol of FAM-labeled peptide/mg of NW |                 |
